# Supplementary material
Source: MDPI journal article supplement (https://www.mdpi.com/2073-4344/12/12/1589)
Supplement: s1 [file s1]

## Supporting Information

# **Pd/Cu-Catalyzed Cross-Coupling of Bis(2-bromovinyl) Selenides with Terminal Acetylenes: Unusual Involvement of Selanyl Function in the Sonogashira Reaction**

Alexander V. Martynov\*, Nataliya A. Makhaeva, Maxim V. Musalov, Alexander I. Albanov, Svetlana V. Amosova

*A. E. Favorsky Irkutsk Institute of Chemistry, Siberian Division of The Russian Academy of Sciences,  
1 Favorsky Str., Irkutsk 664033, Russian Federation*

\* Correspondence: martynov@irioch.irk.ru

$^1\text{H}$ ,  $^{13}\text{C}$  NMR spectra

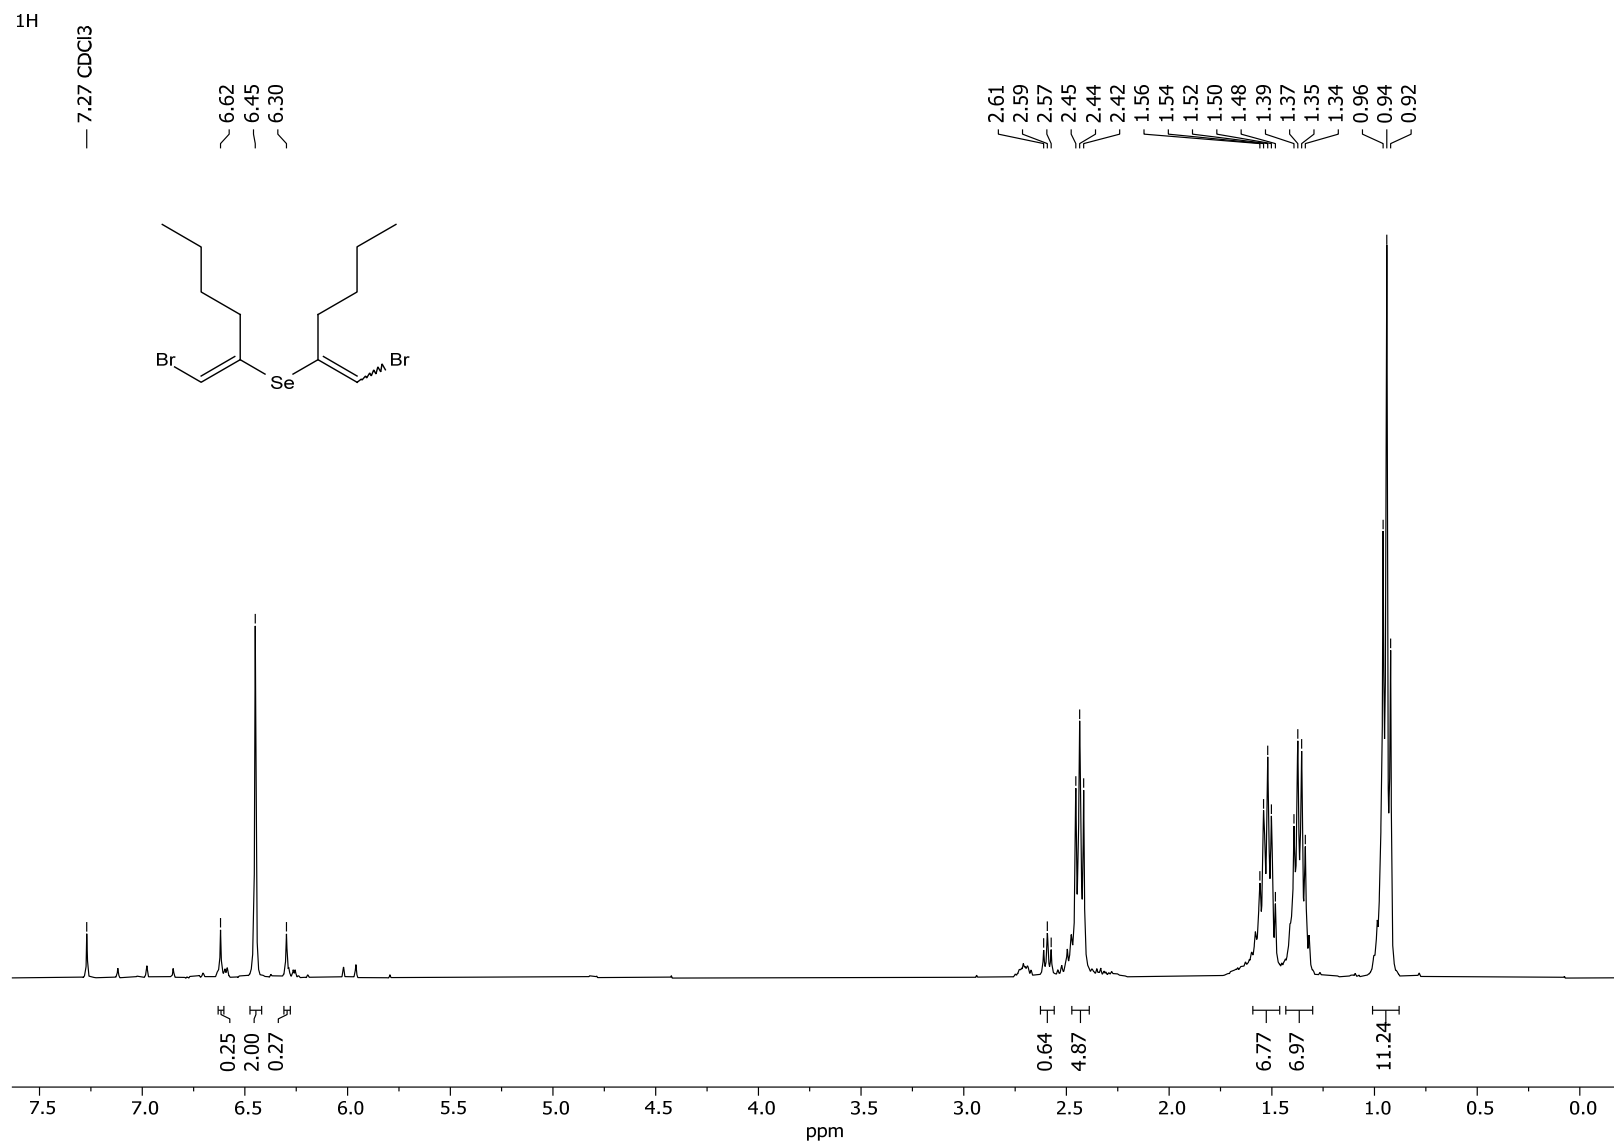

<sup>1</sup>H NMR Spectrum of (E,E)- and (E,Z) isomers (4 : 1) of bis(1-bromo-1-hexen-2-yl) selenide **2**

<sup>13</sup>C

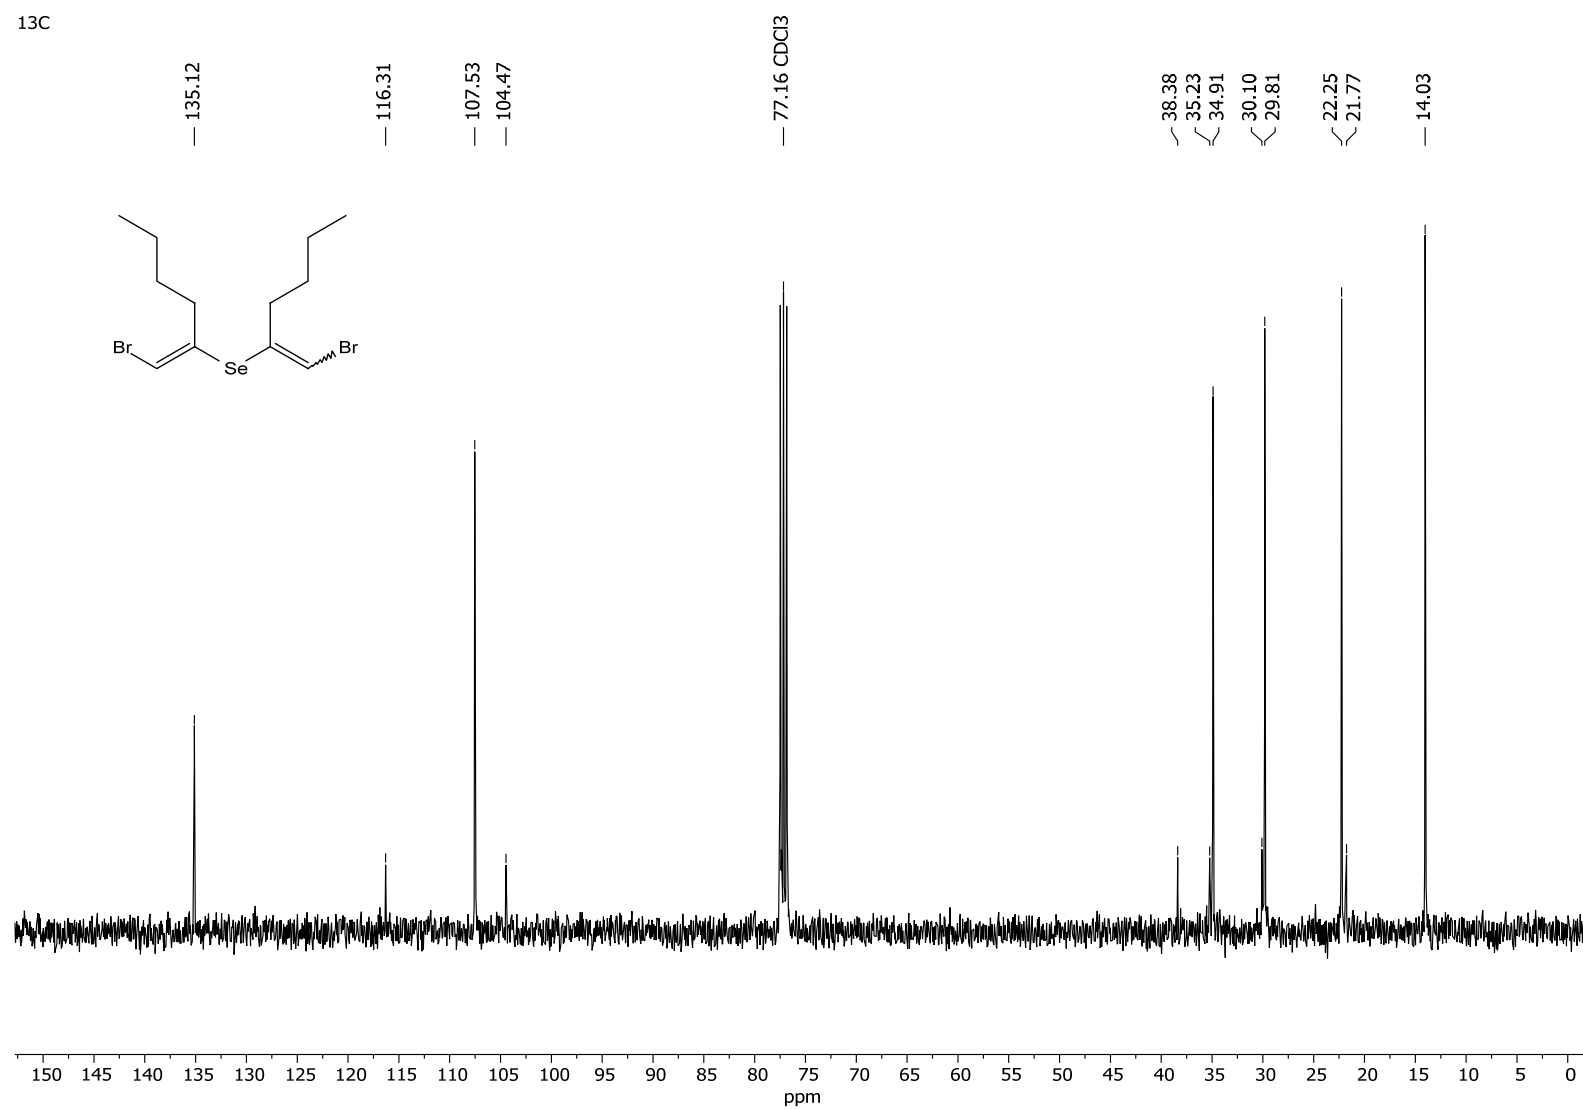

<sup>13</sup>C NMR Spectrum of (*E,E*)- and (*E,Z*) isomers (4 : 1) of bis(1-bromo-1-hexen-2-yl) selenide **2**

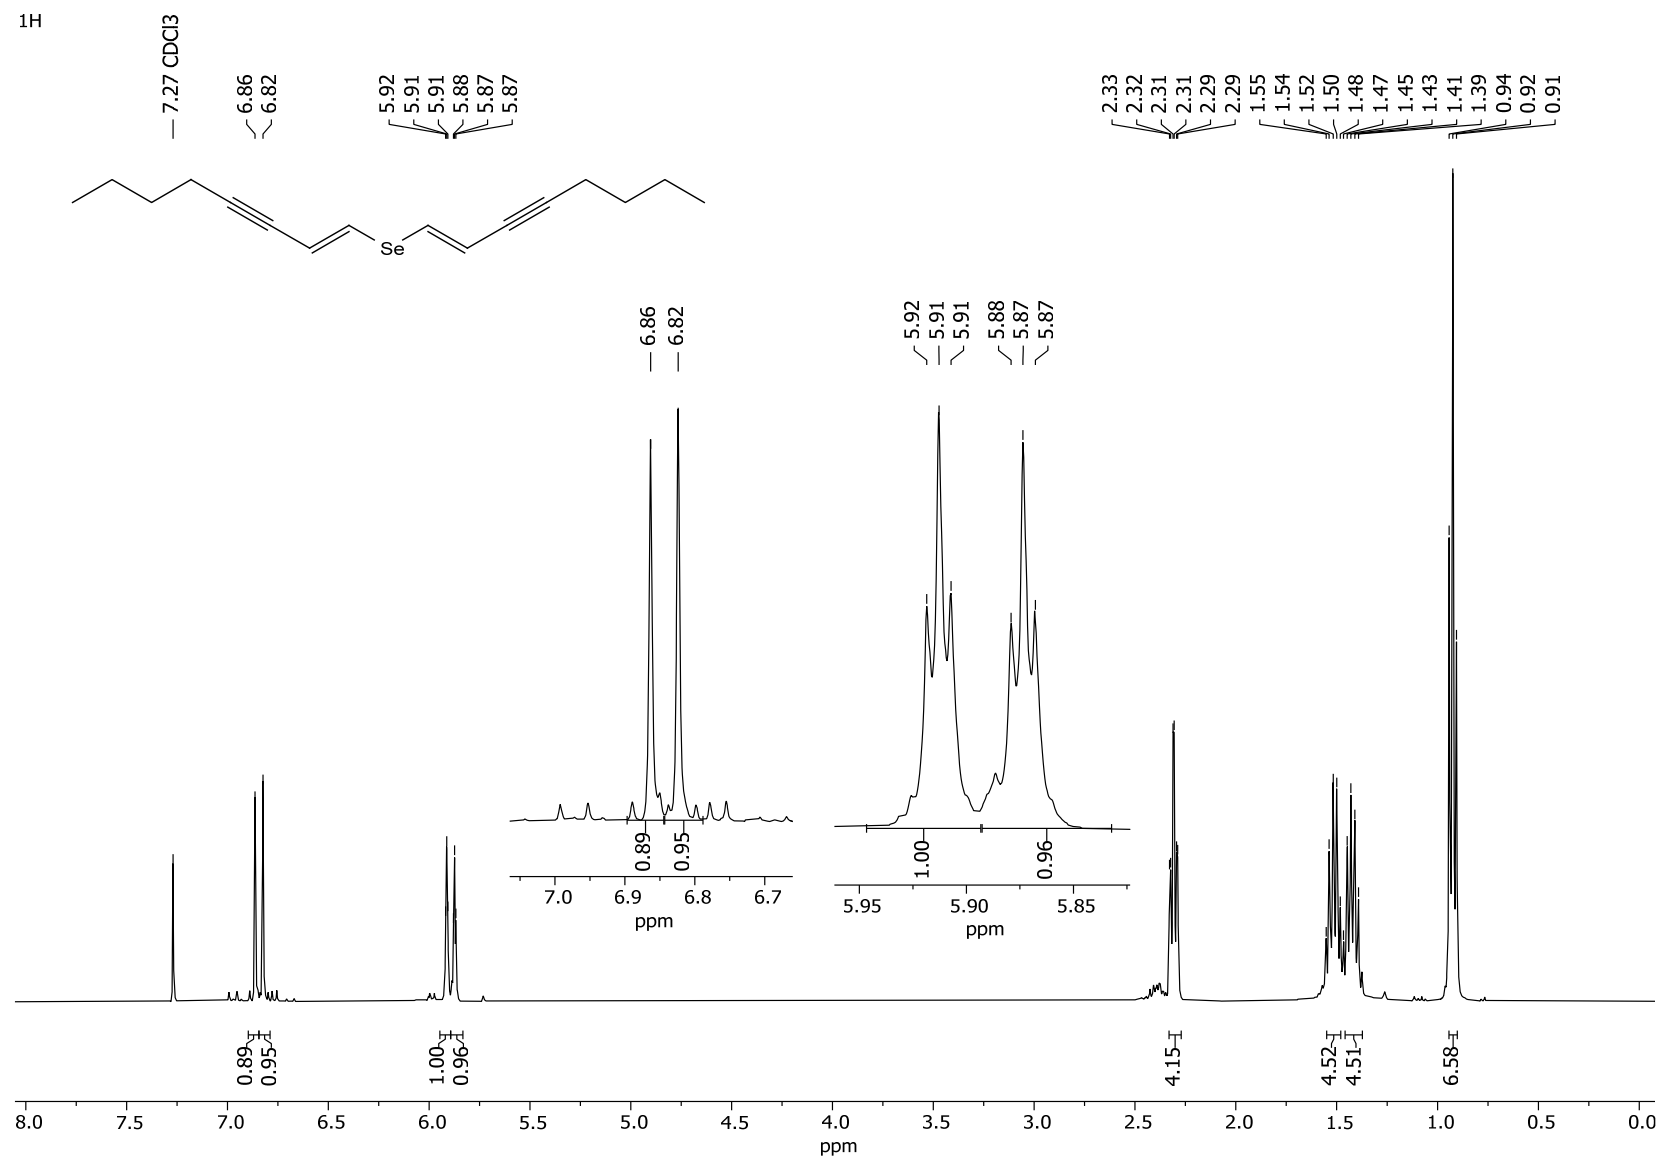

<sup>1</sup>H NMR Spectrum of di[(*E*)-1-octen-3-ynyl] selenide (**4b**)

<sup>13</sup>C

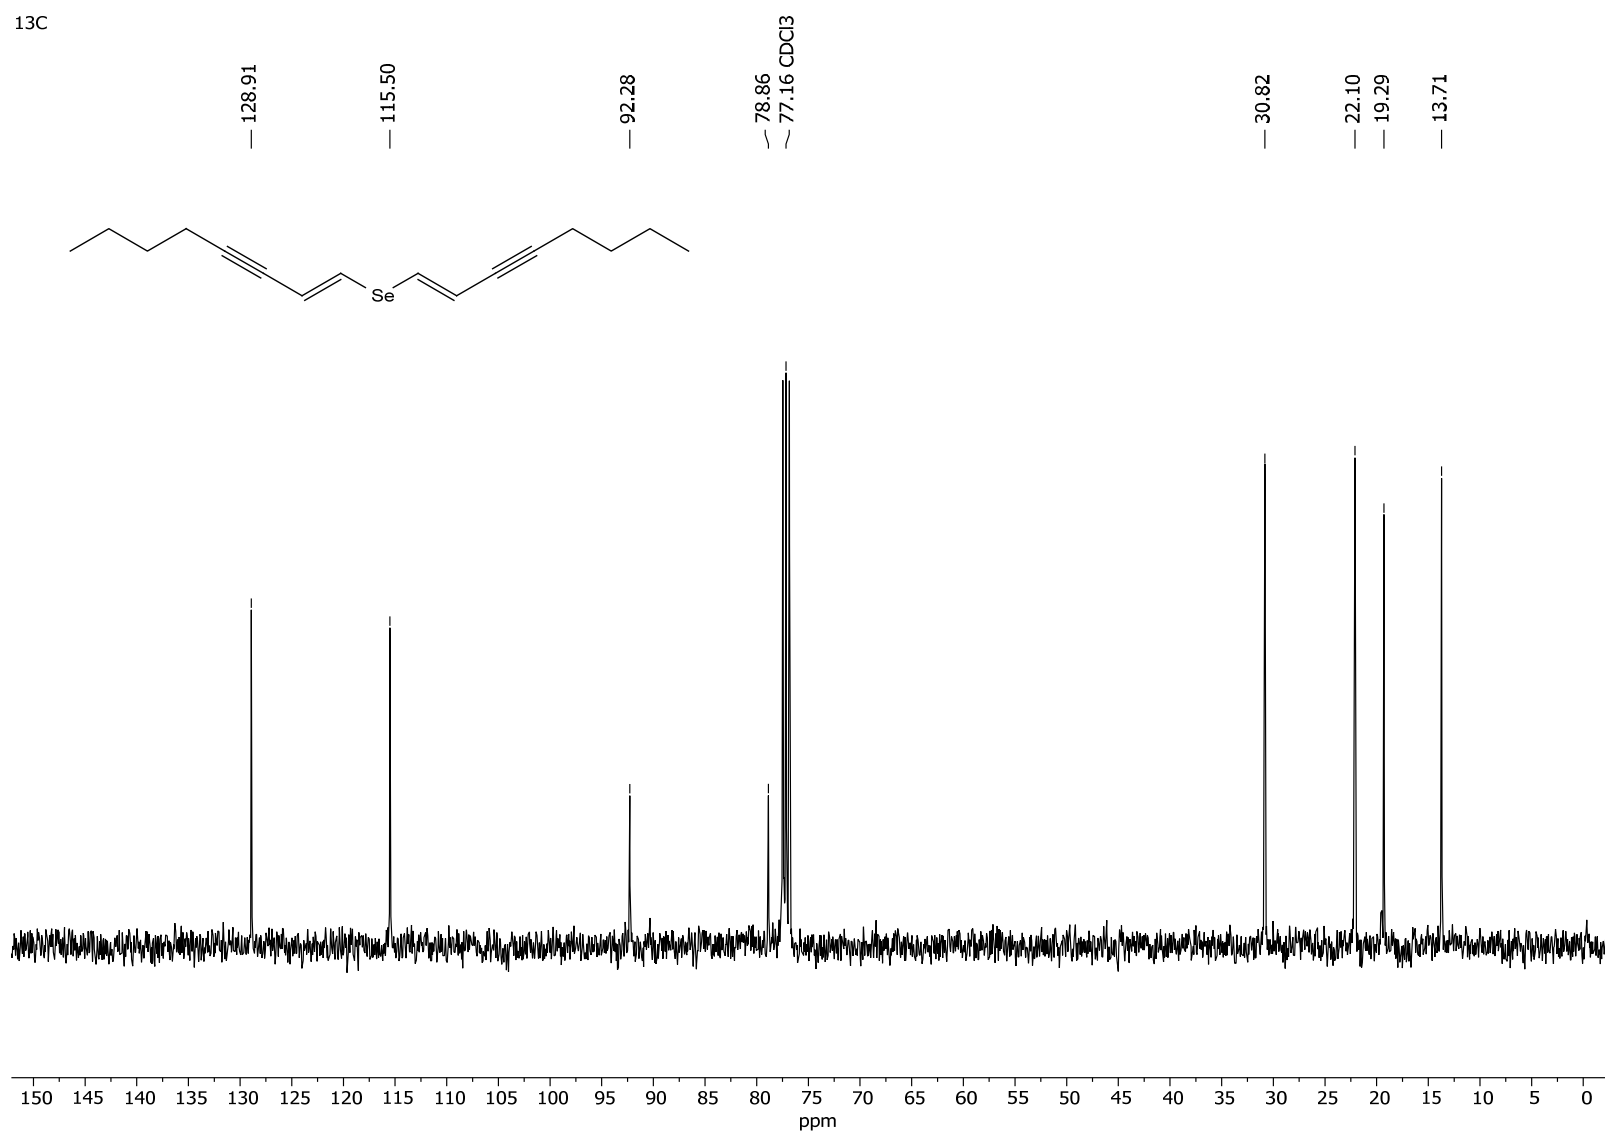

<sup>13</sup>C NMR Spectrum of di[(E)-1-octen-3-ynyl] selenide (**4b**)

<sup>13</sup>C jmod

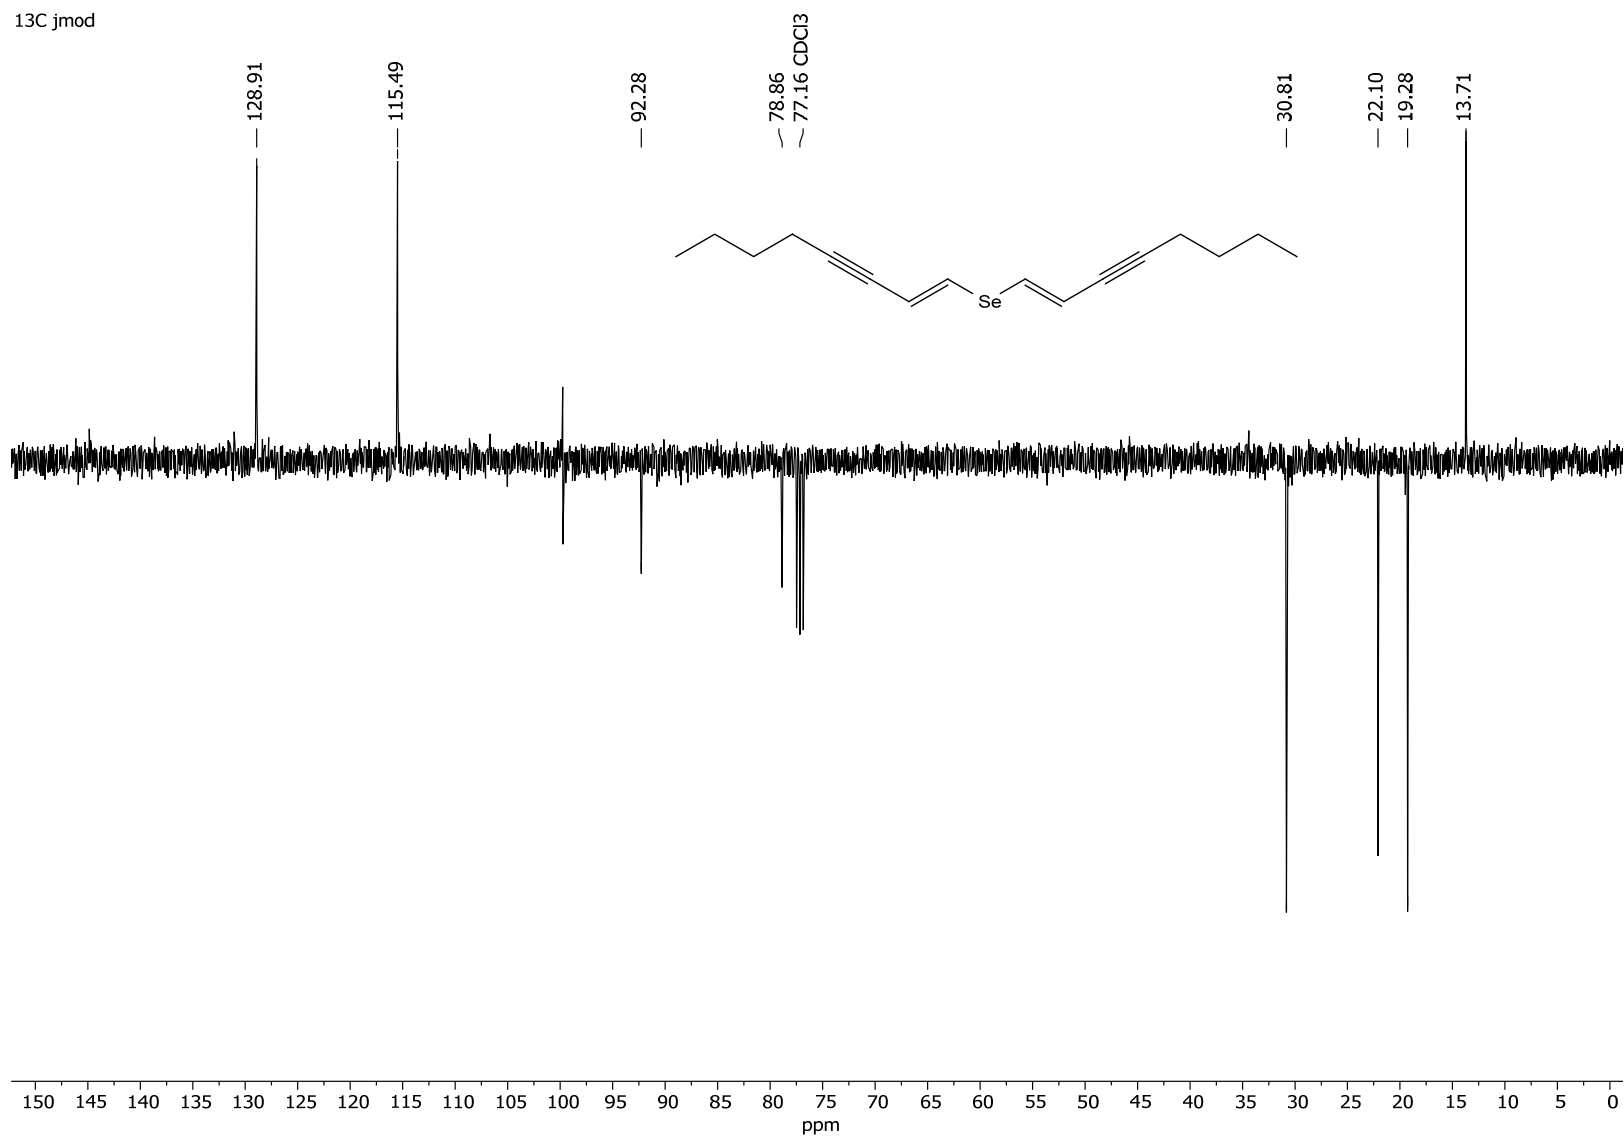

<sup>13</sup>C-jmod NMR Spectrum of di[(*E*)-1-octen-3-ynyl] selenide (**4b**)

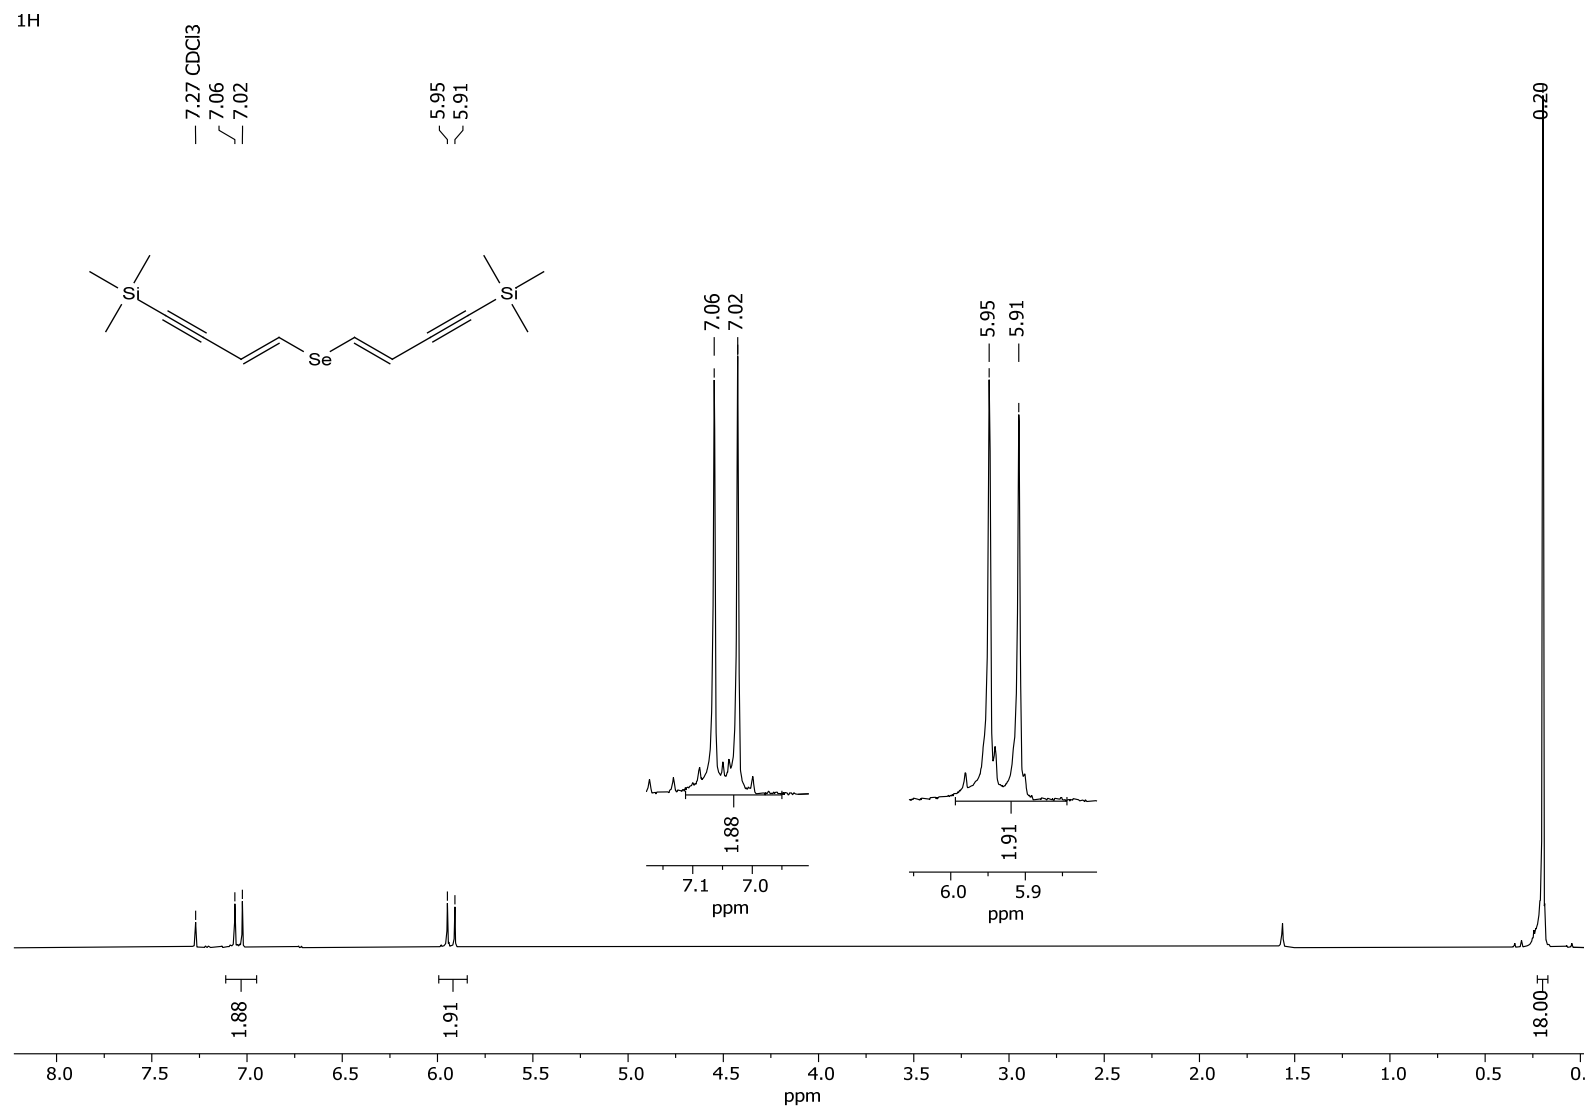

<sup>1</sup>H NMR Spectrum of bis[(*E*)-4-(trimethylsilyl)-1-buten-3-ynyl] selenide (4c)

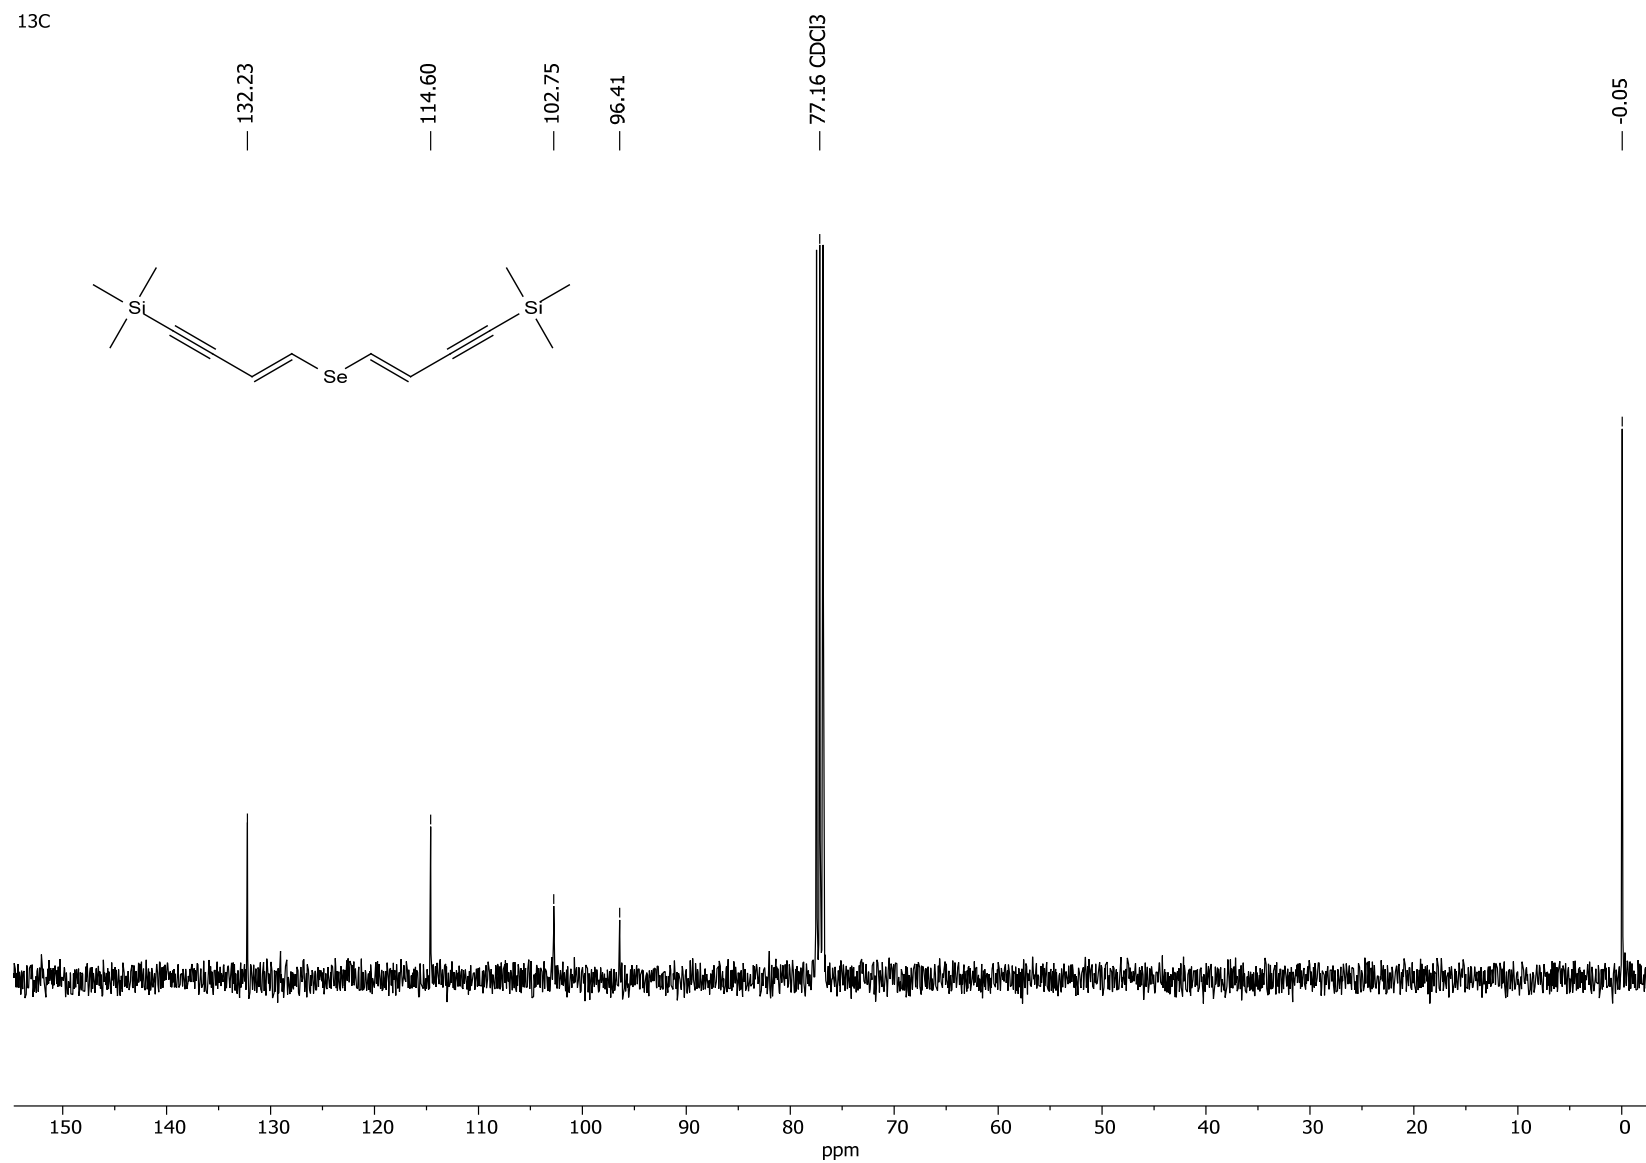

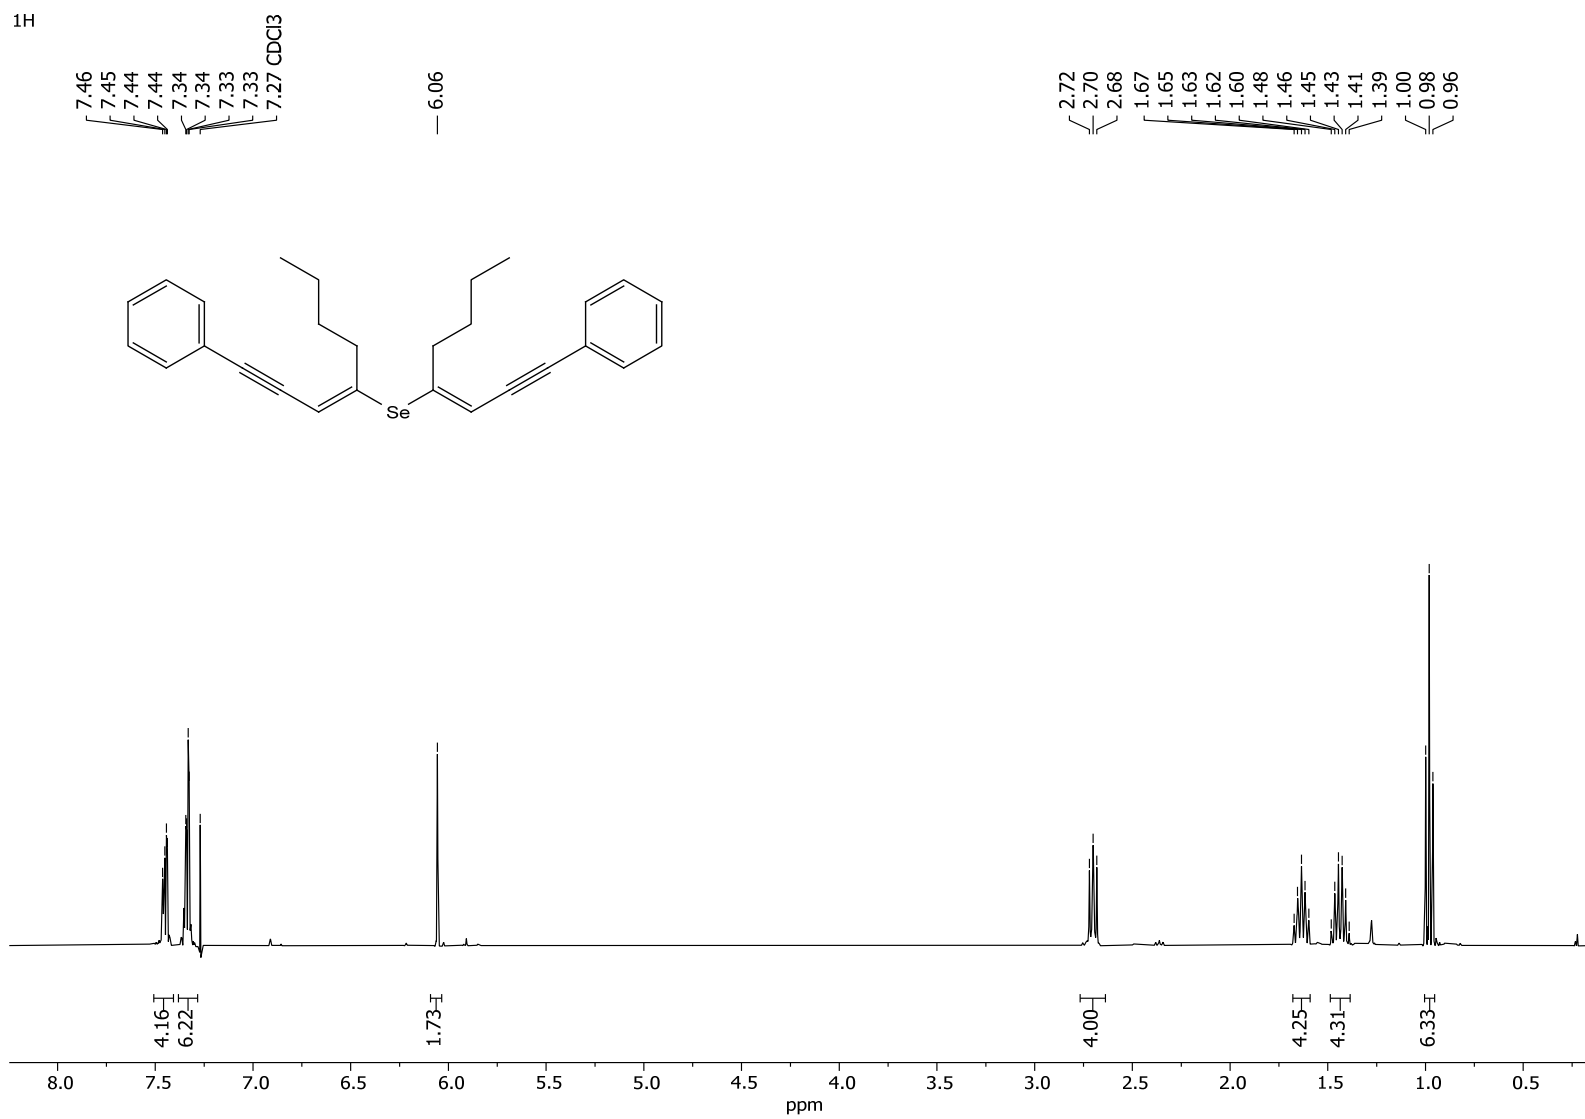

<sup>1</sup>H NMR Spectrum of (E,E)-bis[1-butyl-4-phenyl-1-buten-3-yn-1-yl] selenide (7a)

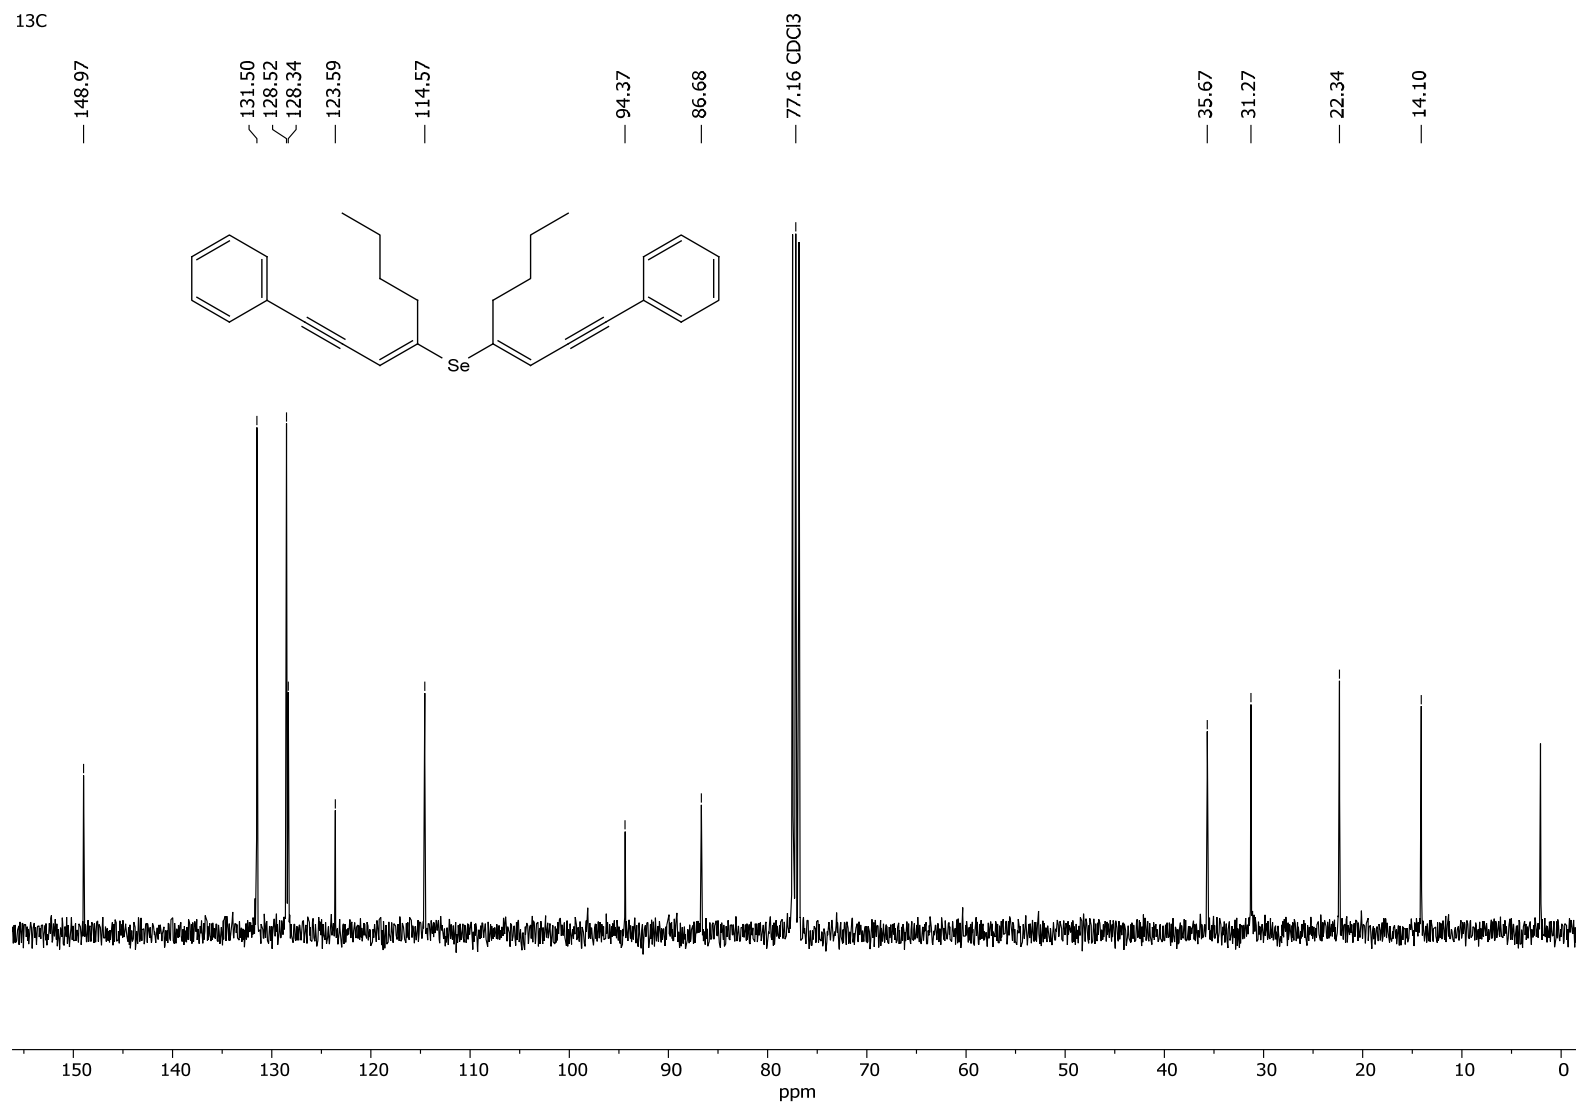

<sup>13</sup>C NMR Spectrum of (*E,E*)-bis[1-butyl-4-phenyl-1-buten-3-yn-1-yl] selenide (7a)

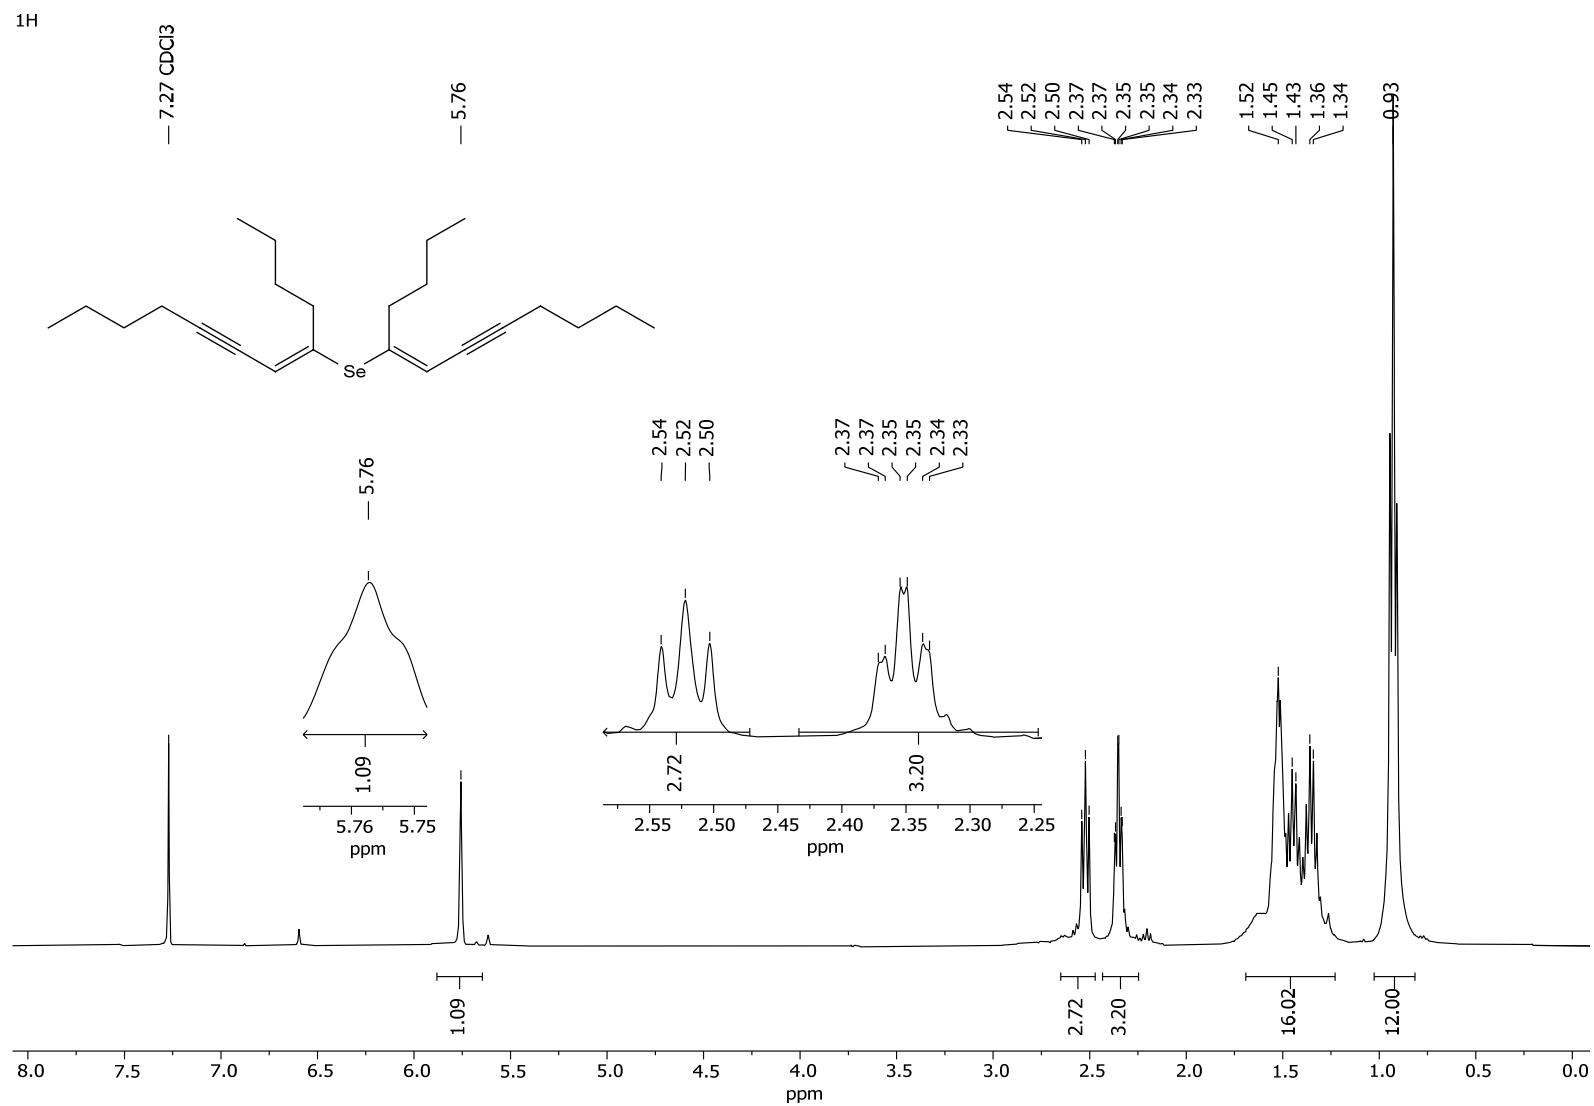

<sup>1</sup>H NMR Spectrum of (E,E)-Bis[1-butyl-1-octen-3-yn-1-yl] selenide (**7b**)

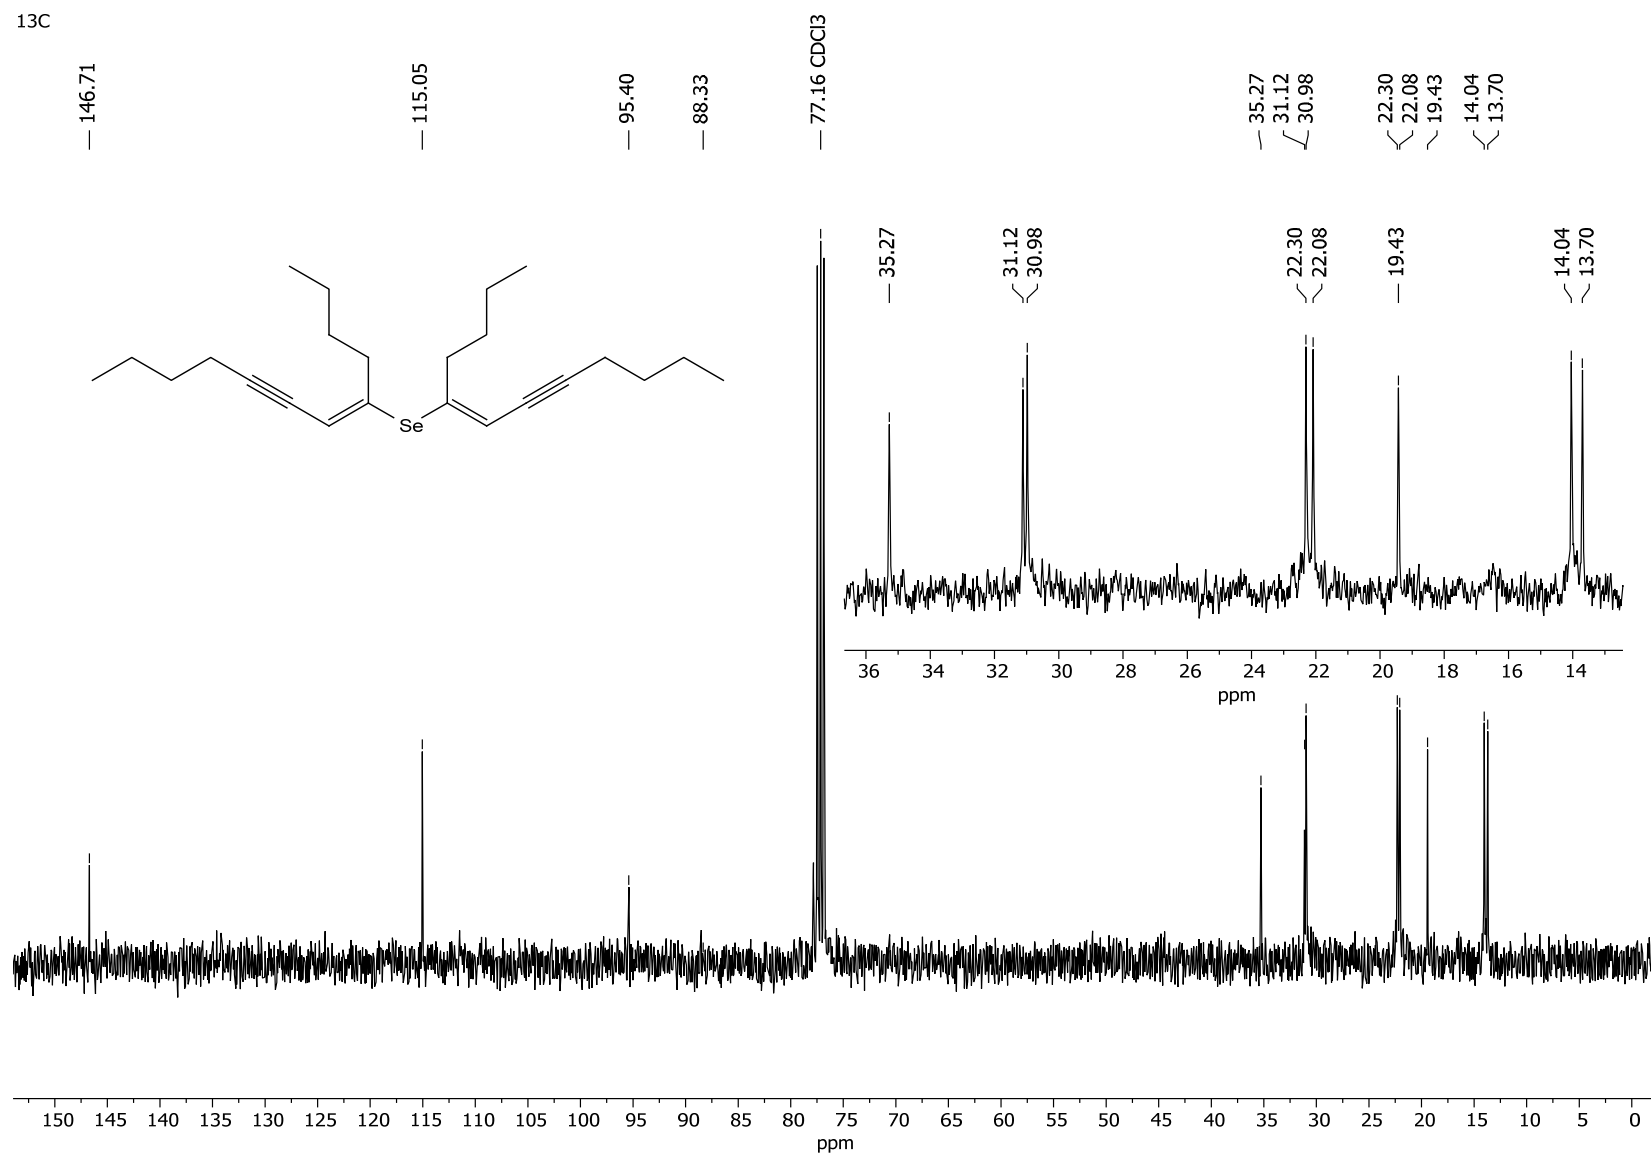

<sup>1</sup>H

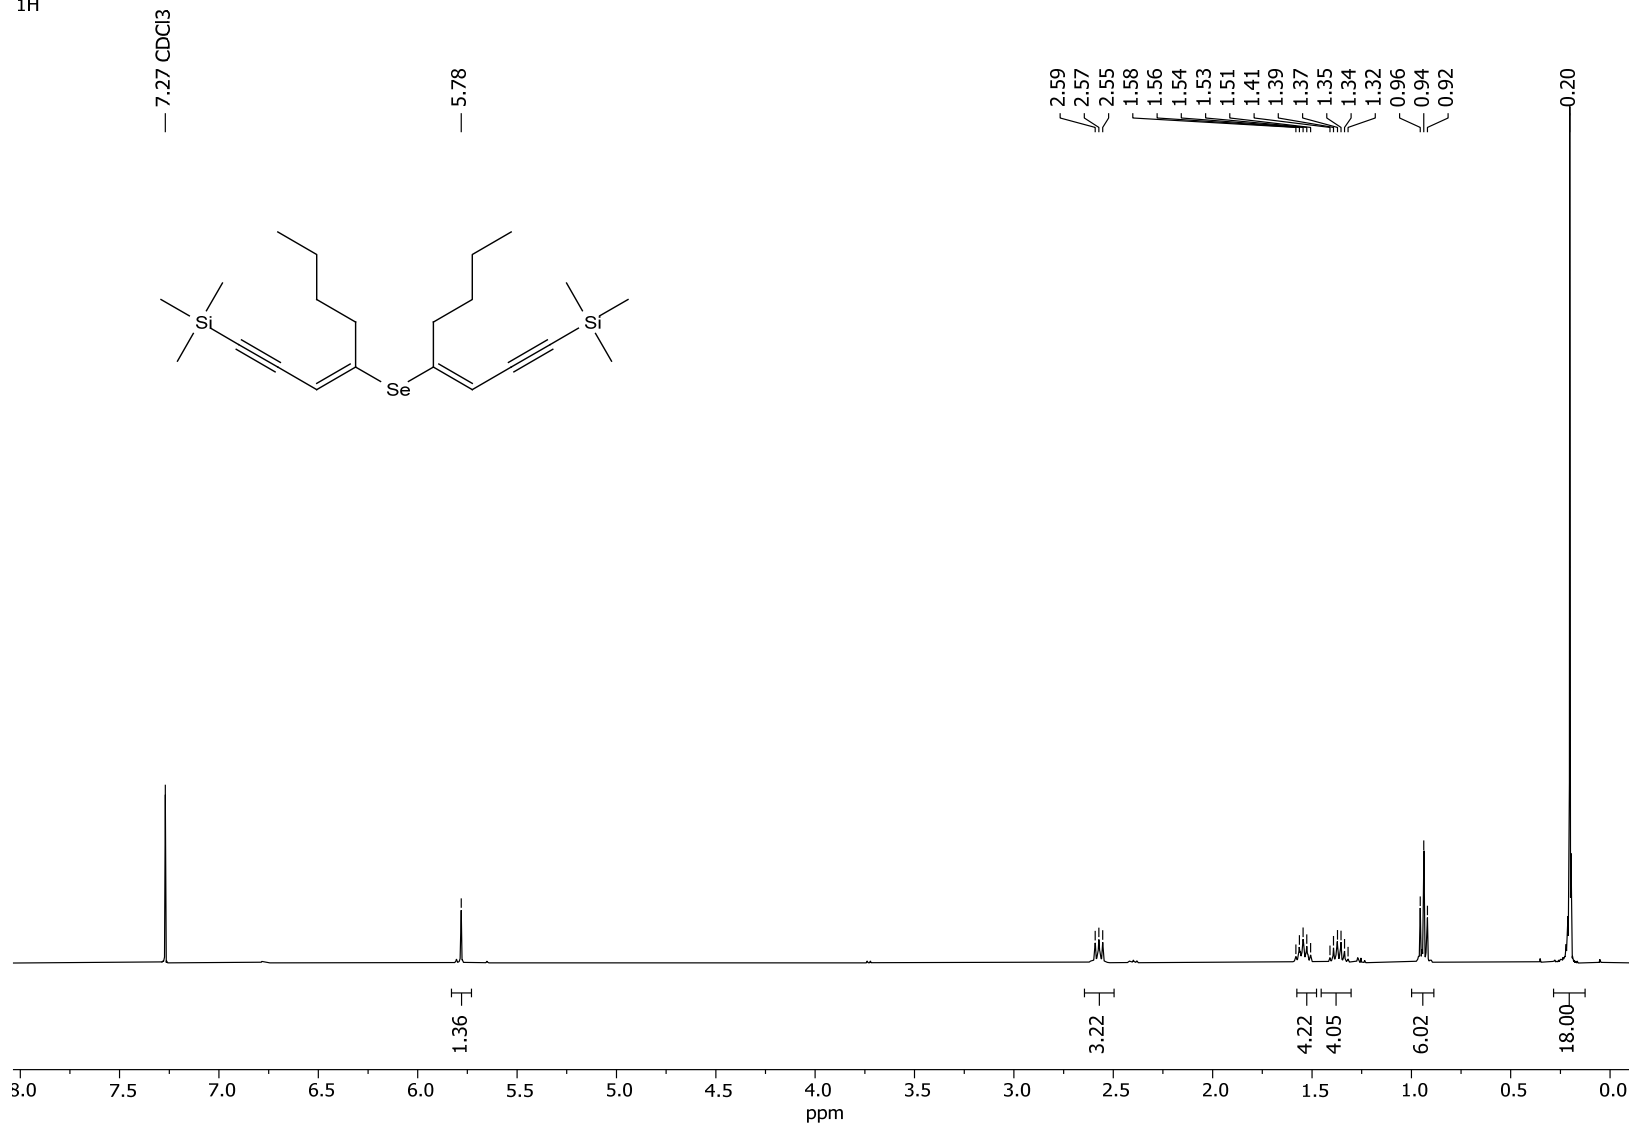

<sup>1</sup>H NMR Spectrum of (*E,E*)-bis[1-butyl-4-(trimethylsilyl)-1-buten-3-ynyl] selenide (**7c**)

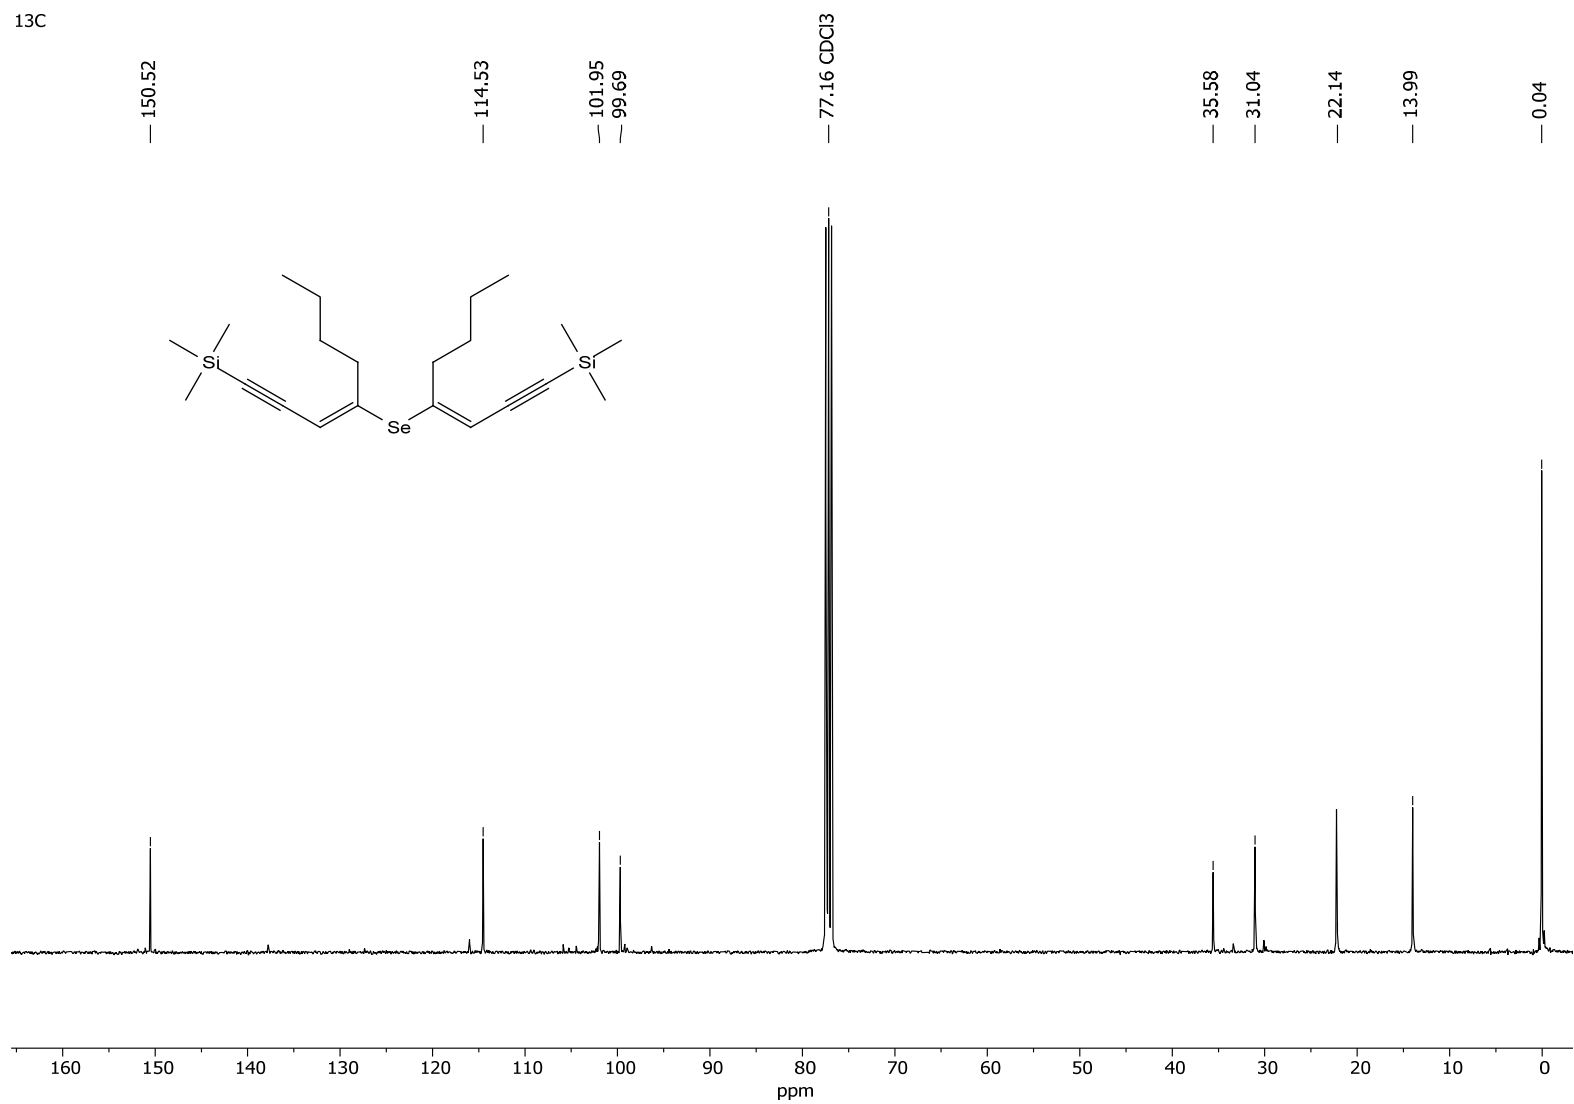

<sup>13</sup>C NMR Spectrum of (E,E)-bis[1-butyl-4-(trimethylsilyl)-1-buten-3-ynyl] selenide (7c)

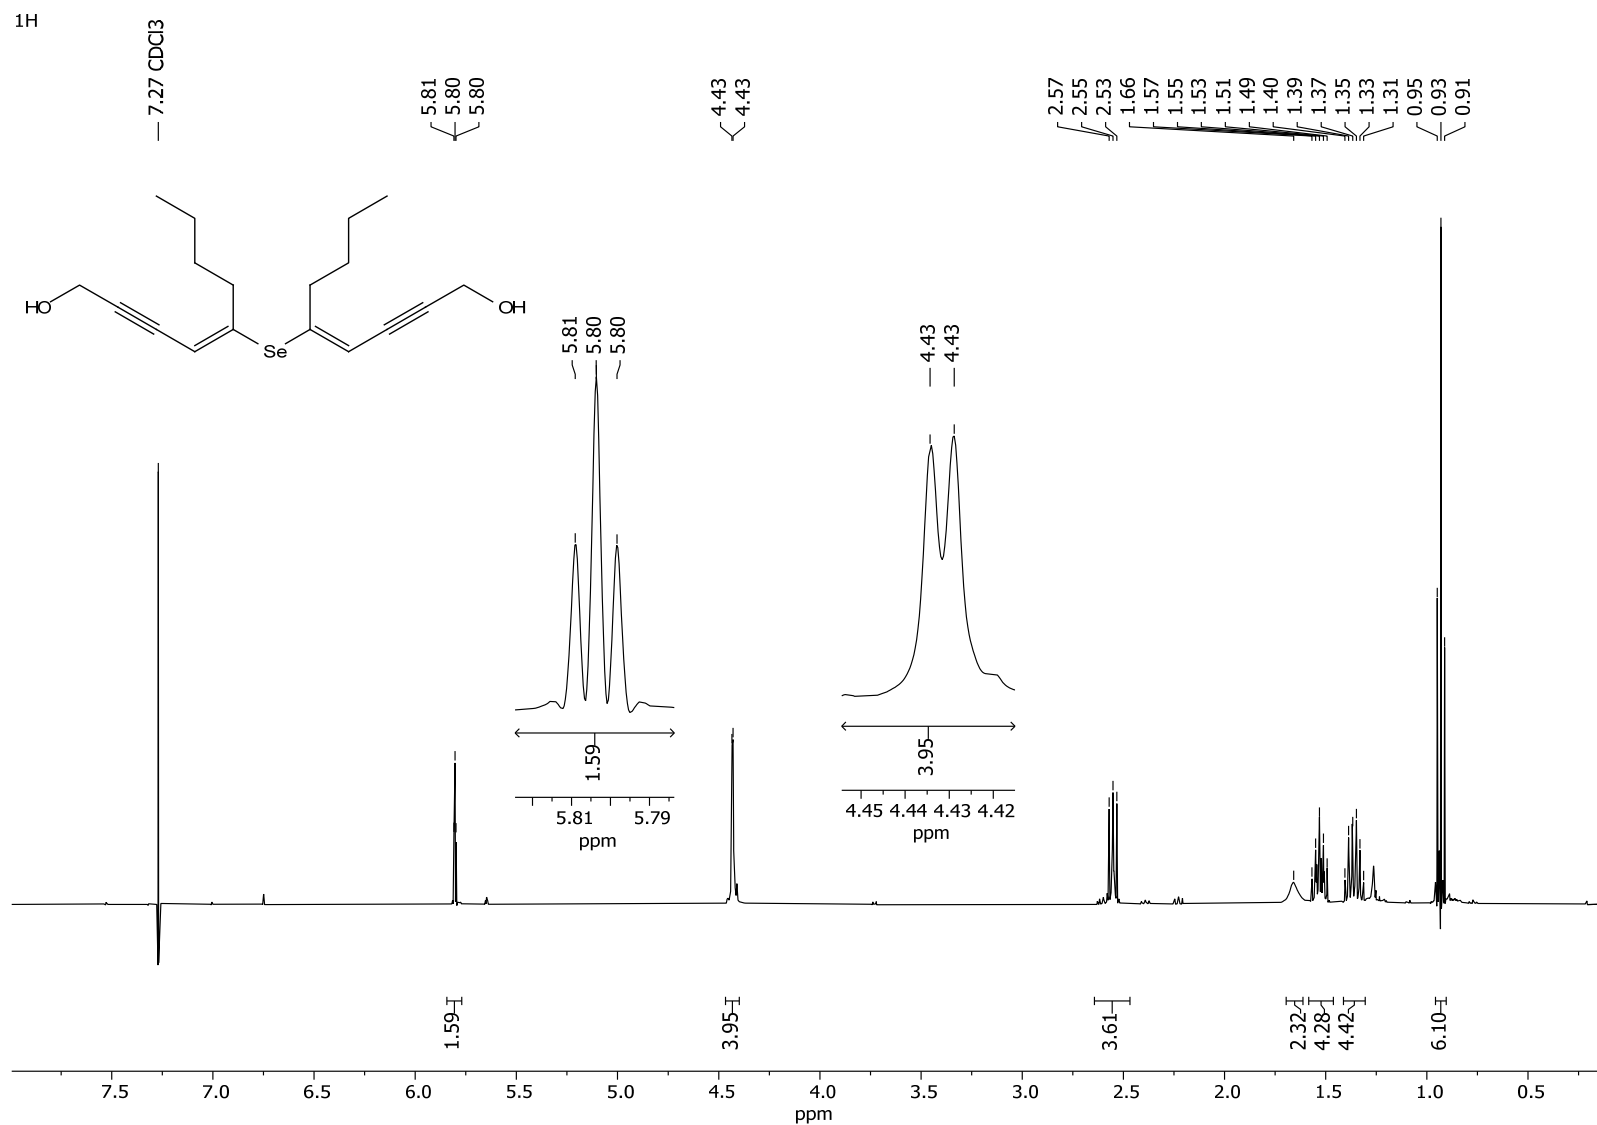

<sup>1</sup>H NMR Spectrum of (E)-5-[(E)-1-butyl-5-hydroxy-1-penten-3-ynyl] selanyl-4-nonen-2-yn-1-ol (**7d**)

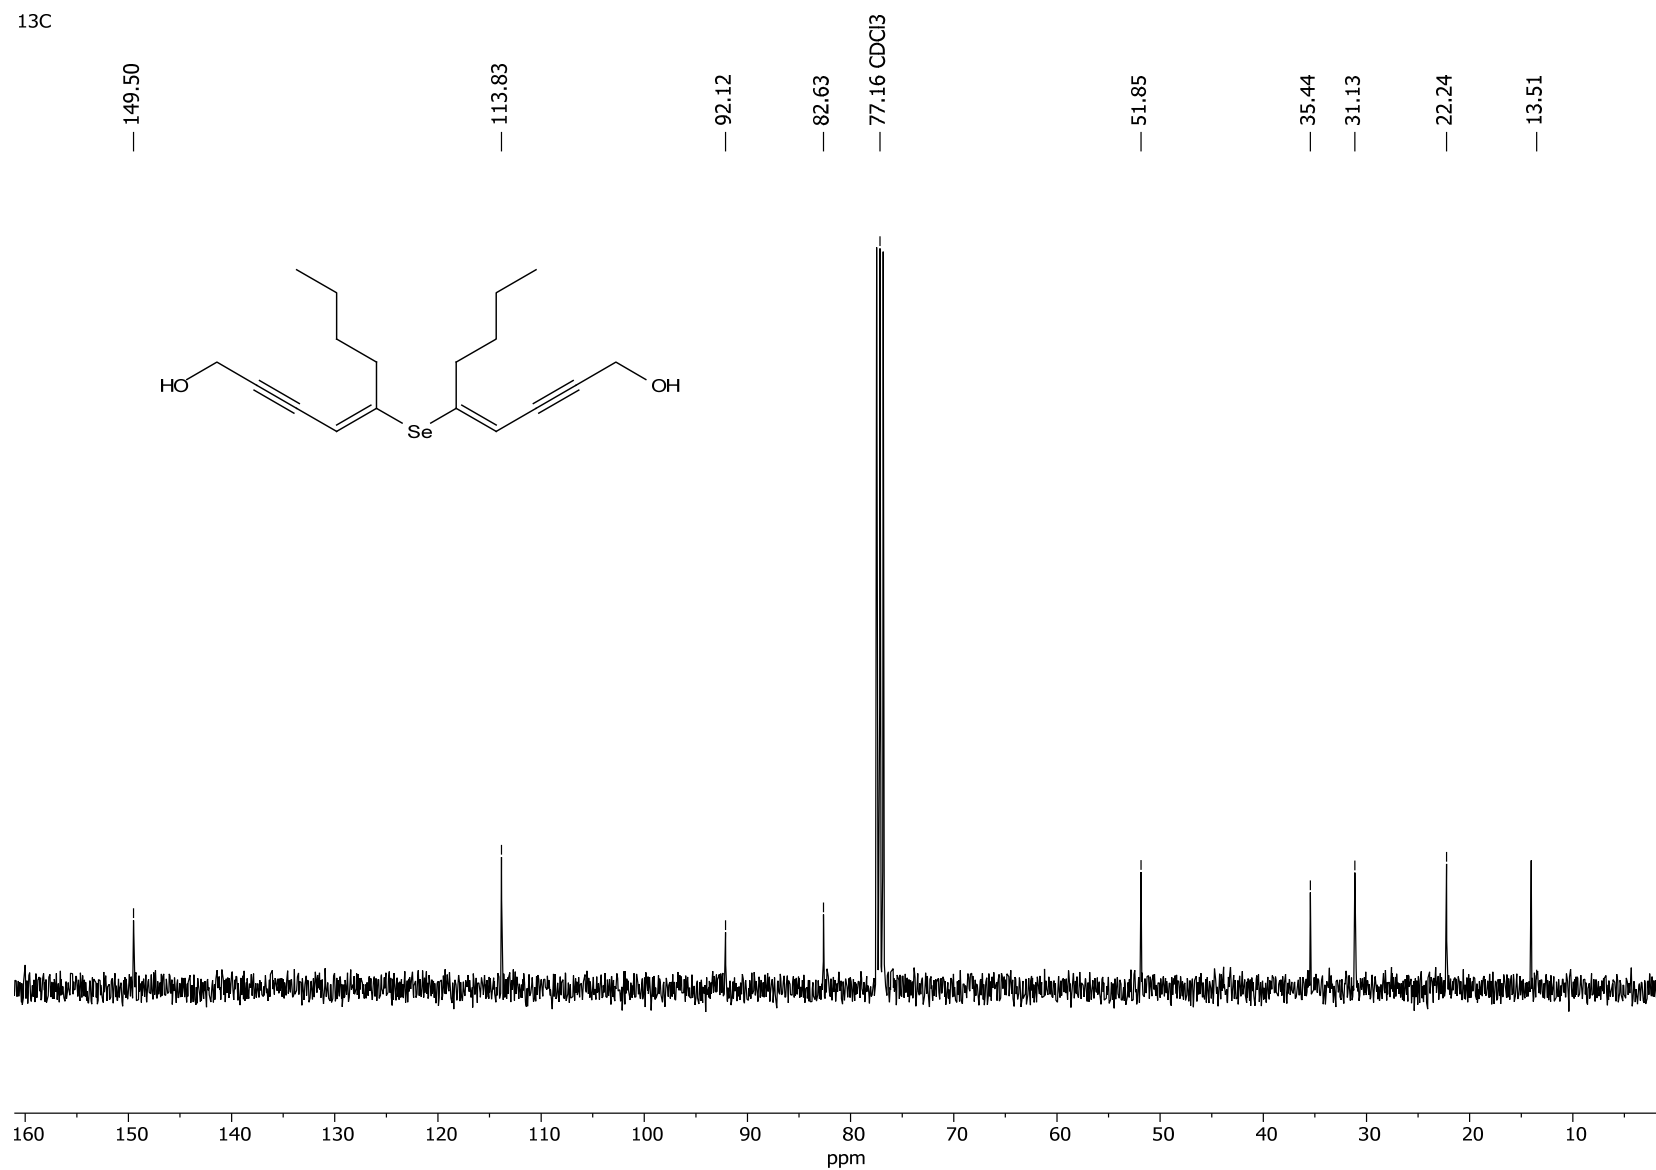

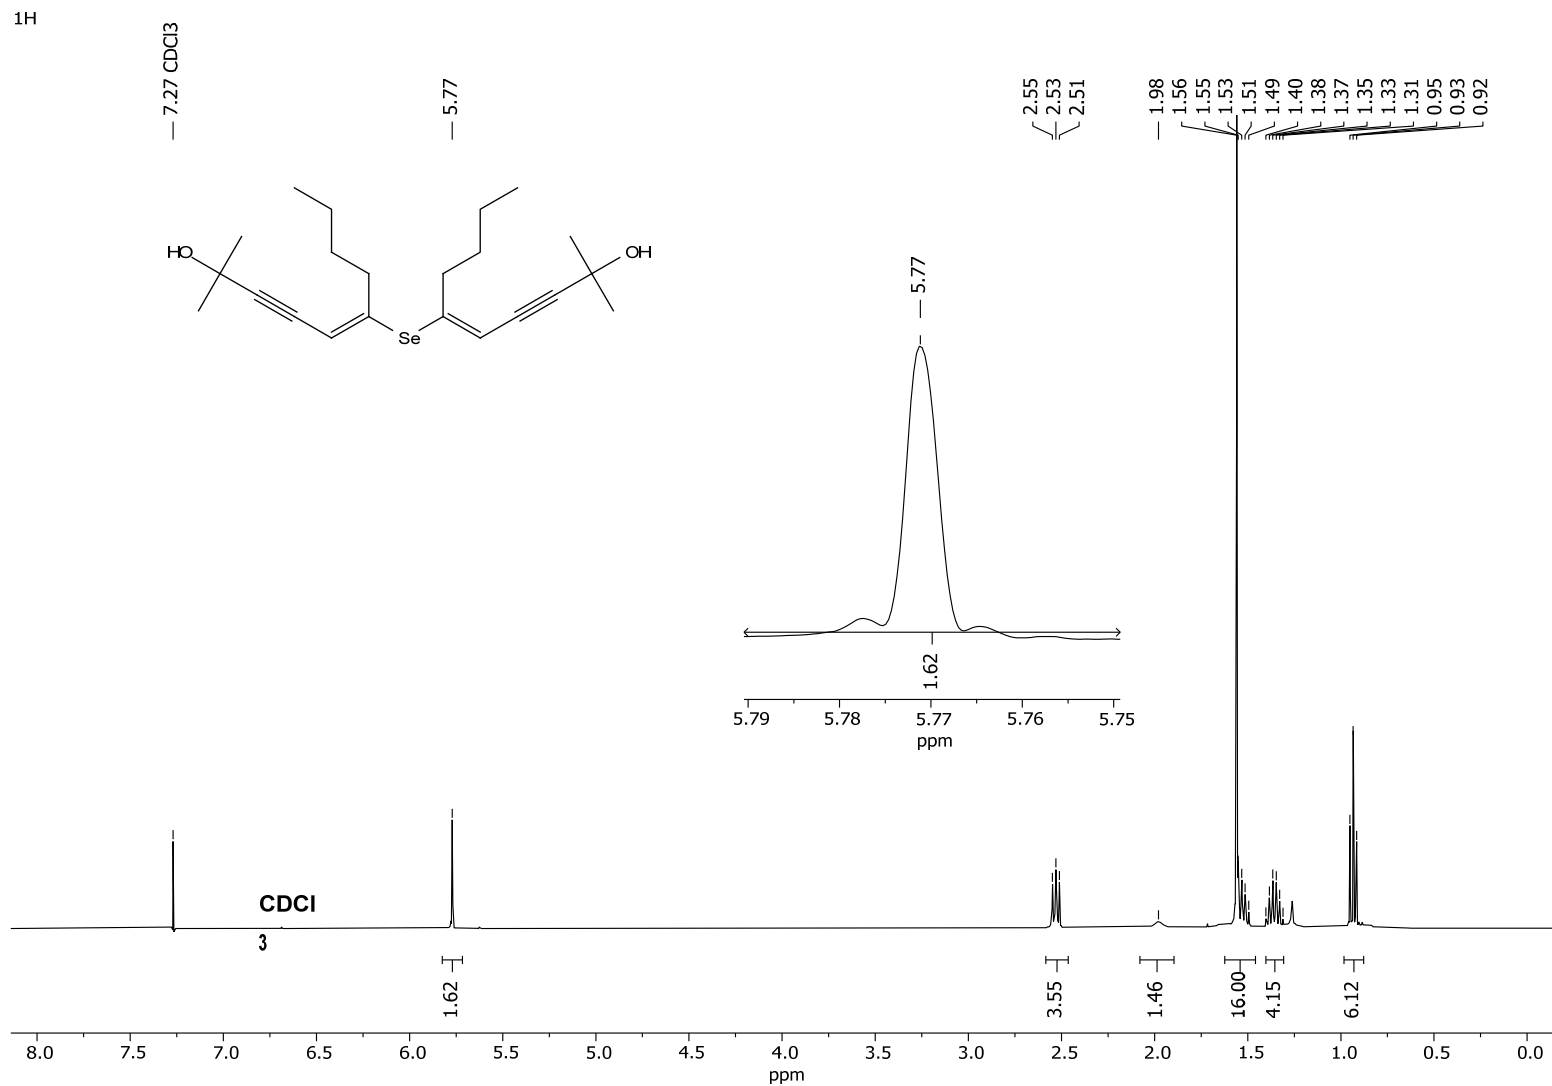

<sup>1</sup>H NMR Spectrum of (*E*)-6-[(*E*)-1-butyl-5-hydroxy-5-methyl-1-hexen-3-ynyl]selanyl-2-methyl-5-decen-3-yn-2-ol (**7e**)

<sup>13</sup>C

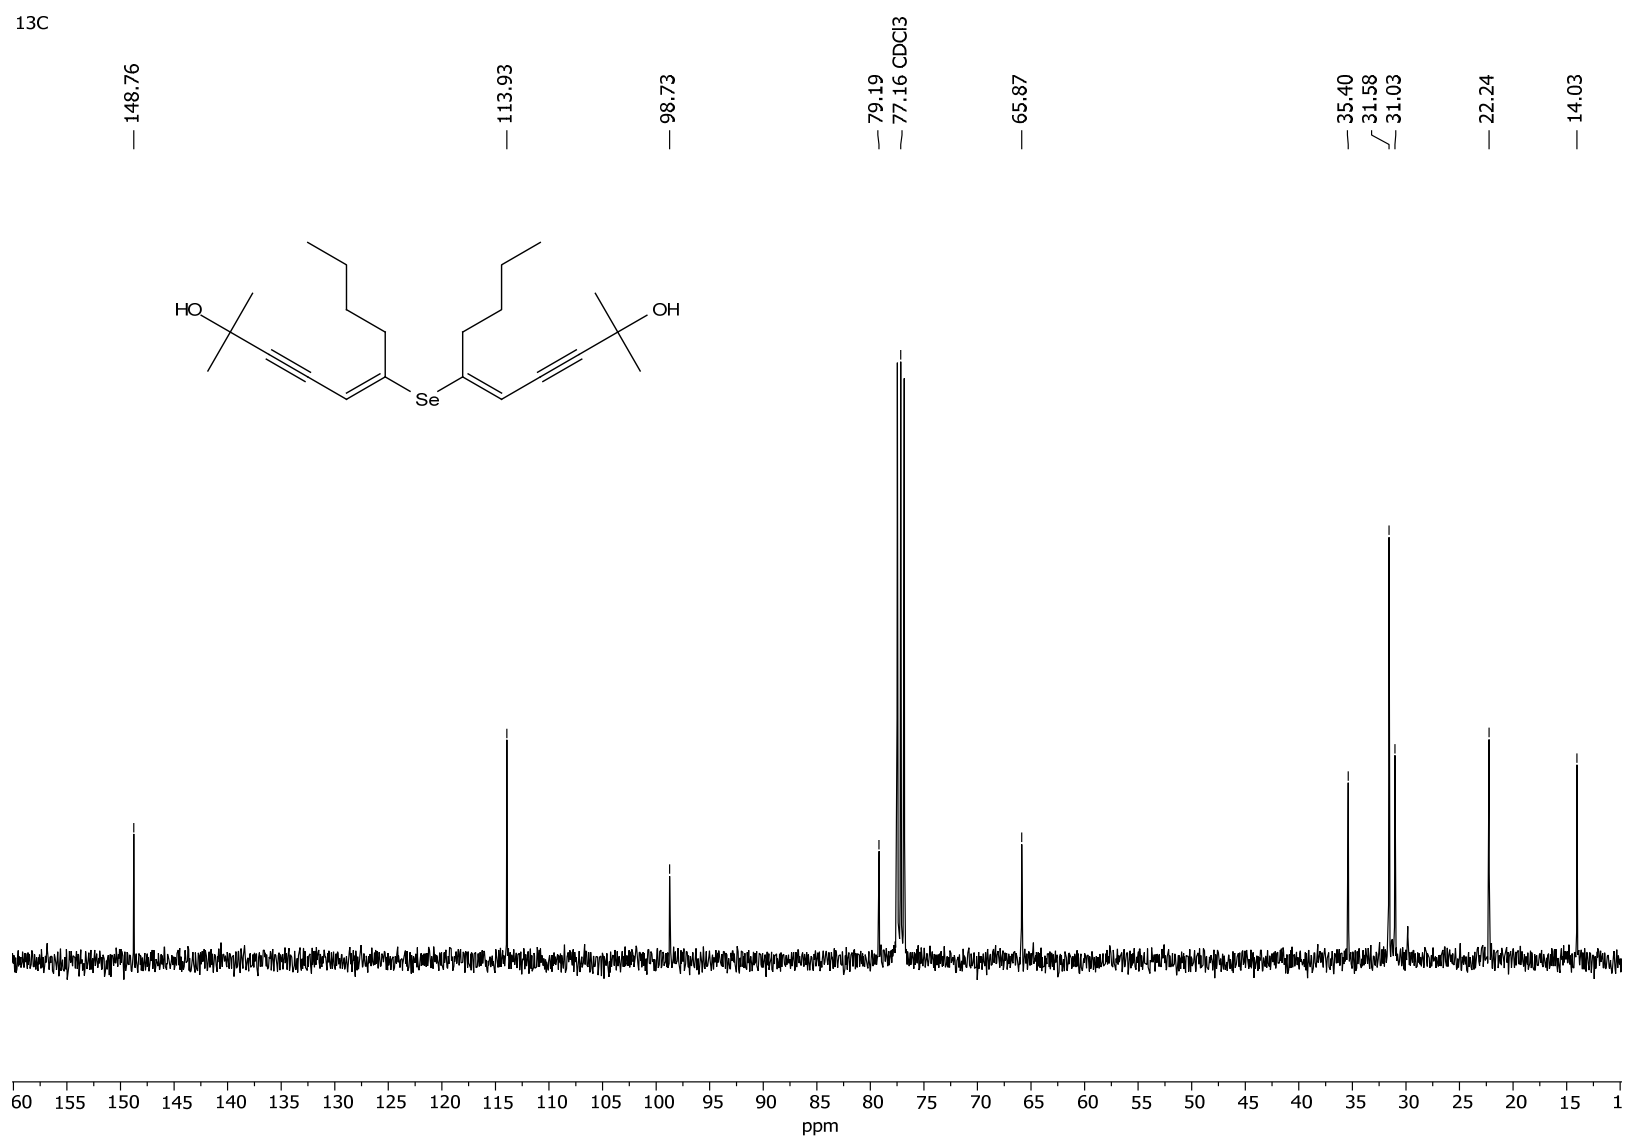

<sup>13</sup>C NMR Spectrum of (E)-6-[(E)-1-butyl-5-hydroxy-5-methyl-1-hexen-3-ynyl]selanyl-2-methyl-5-decen-3-yn-2-ol (7e)
